# Supplementary material for: Enhancing coulombic efficiency and rate capability of high capacity lithium excess layered oxide cathode material by electrocatalysis of nanogold
Source: Royal Society of Chemistry journal article supplement (doi:10.1039/c5ra26667j), 2016-01-01
Supplement: c5ra26667j1.pdf [file c5ra26667j1.pdf]

## Supplementary Information

### Enhancing coulombic efficiency and rate capability of high capacity lithium excess layered oxide cathode material by electrocatalysis of nanogold

Quanxin Ma, Deying Mu, Yuanlong Liu, Shibo Yin, Changsong Dai\*

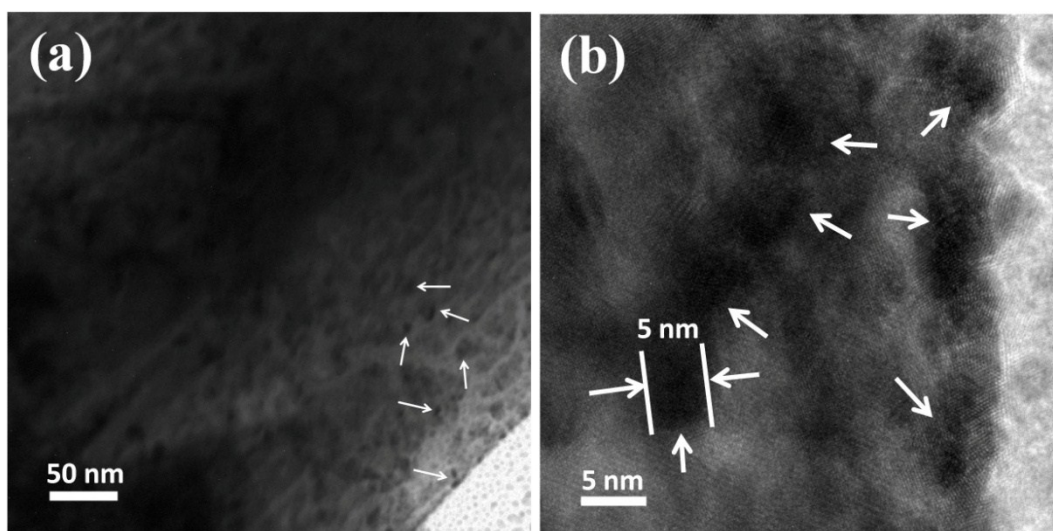

Fig. S1 HRTEM images of the Au@LMNCO sample at different magnifications

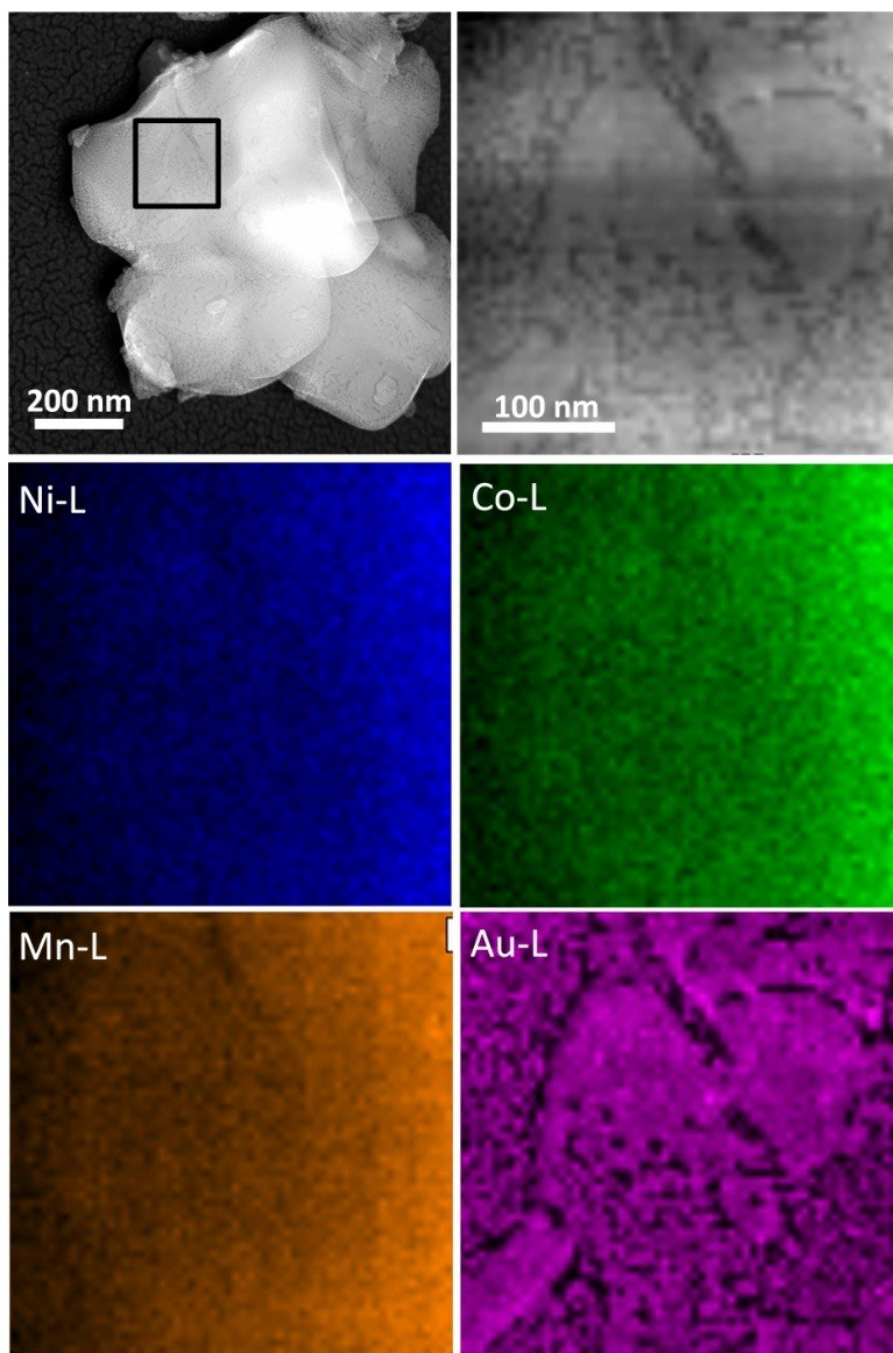

Fig. S2 Elemental mapping of the Au@LMNCO sample by scanning TEM (STEM)
